# Supplementary material for: S100A8 and S100A9 in experimental osteoarthritis
Source: Arthritis Res Ther. 2010 Jan 27;12(1):R16. doi: 10.1186/ar2917 (PMC2875644; doi:10.1186/ar2917)
Supplement: Additional file 2 — Excel file containing the raw microarray data from the Agilent 44 K arrays comparing the expression of S100 proteins in femoral head cartilage pooled from three separate cultures under control and IL-1-stimulated conditions for two and four day. [file ar2917-S2.xls]

## Sheet: Sheet3
AGILENT 44K ARRAY
RNA FROM 3 POOLED MOUSE FEMORAL HEAD CARTILAGES CULTURED FOR 2 OR 4 DAYS
Gene Name	TopHit	Description	Row	Name	ID	Ref Number	Normalised Day 2 IL-1/Control Log2 Ratio	Normalised Day 2 Control/IL-1 Log2 Ratio	Day 2 IL-1 : Control Log2 Ratio	Day 2 Average Expression	Day 2 t	Day 2 B statistic	Normalised Day 4 IL-1/Control Log2 Ratio	Normalised Day 4 Control/IL-1 Log2 Ratio	Day 4 IL-1 : Control Log2 Ratio	Day 4 Average Expression	Day 4 t	Day 4 B statistic
S100a1	ref|NM_011309|gb|DV063732|gb|AF087687|gb|AK002721	Mus musculus S100 calcium binding protein A1 (S100a1), mRNA [NM_011309]	294	NM_011309	A_51_P172475	15119	-0.544822	0.667339	-0.606081	12.0663	-4.05863	-2.99102	-0.679184	0.571381	-0.625283	12.6765	-5.50916	-2.64757
S100a10	ref|NM_009112|gb|AK161647|gb|AK170919|gb|AK149077	Mus musculus S100 calcium binding protein A10 (calpactin) (S100a10), mRNA [NM_009112]	298	NM_009112	A_51_P342871	24577	-0.710784	0.732642	-0.721713	11.2267	-3.55166	-3.49499	-0.629641	0.263972	-0.446806	12.9313	-2.84632	-4.56689
S100a11	ref|NM_016740|ref|XM_904150|gb|U41341|gb|AK002490	Mus musculus S100 calcium binding protein A11 (calizzarin) (S100a11), mRNA [NM_016740]	383	NM_016740	A_51_P155643	39369	0.563862	-0.519869	0.541866	13.0556	3.18901	-3.88143	0.781291	0.386847	0.197222	13.6176	0.521186	-6.8962
S100a13	ref|NM_009113|gb|DV049488|gb|AK002755|gb|AK008895	Mus musculus S100 calcium binding protein A13 (S100a13), mRNA [NM_009113]	425	NM_009113	A_51_P269852	12258	0.478892	-0.431799	0.455345	12.4583	2.82323	-4.29278	0.311264	-0.146317	0.228791	12.8086	1.9077	-5.51596
S100a14	ref|NM_025393|gb|AK132637|gb|AK003669|gb|BC025607	Mus musculus S100 calcium binding protein A14 (S100a14), mRNA [NM_025393]	321	NM_025393	A_51_P419226	38110	-0.31451	-0.193402	-0.0605538	3.73042	-0.235354	-6.96052	0.409111	2.64202	-1.11645	3.5671	-1.17137	-6.31755
S100a15	ref|NM_199422|gb|AY465109|ens|ENSMUST00000079286|tc|NP955990	Mus musculus S100 calcium binding protein A15 (S100a15), mRNA [NM_199422]	36	NM_199422	A_52_P63855	35888	-0.540621	0.819894	-0.680258	4.14818	-4.09326	-2.95811	-1.29614	-0.139064	-0.57854	7.12847	-1.26199	-6.22138
S100a16	ref|NM_026416|gb|BG246938|gb|AY221962|gb|AK160512	Mus musculus S100 calcium binding protein A16 (S100a16), mRNA [NM_026416]	126	NM_026416	A_51_P134533	35413	-0.225456	-0.0663439	-0.0795561	10.2602	-0.439062	-6.87799	-0.333793	-0.168594	-0.0825997	11.8845	-0.434899	-6.94829
S100a3	ref|NM_011310|gb|BC100690|gb|BC099893|gb|BC100696	Mus musculus S100 calcium binding protein A3 (S100a3), mRNA [NM_011310]	33	NM_011310	A_51_P468456	39974	-0.479418	0.281712	-0.380565	6.42474	-2.4566	-4.72469	-0.689903	0.621483	-0.655693	6.84821	-5.93308	-2.42235
S100a4	ref|NM_011311|gb|CB571206|gb|D00208|gb|AK003065	Mus musculus S100 calcium binding protein A4 (S100a4), mRNA [NM_011311]	289	NM_011311	A_51_P105078	5876	-2.73641	2.83112	-2.78377	10.2847	-18.7412	2.88638	-2.73453	2.8715	-2.80301	10.6457	-24.0626	0.959833
S100a5	ref|NM_011312|gb|AI327447|gb|AF087469|ens|ENSMUST00000001049	Mus musculus S100 calcium binding protein A5 (S100a5), mRNA [NM_011312]	206	NM_011312	A_51_P108812	14733	-0.517942	-0.376861	-0.0705406	3.37298	-0.261296	-6.95266	0.258423	-0.273122	0.265772	4.96077	2.44836	-4.9512
S100a6	ref|NM_011313|gb|X52278|gb|AK151587|gb|AK008241	Mus musculus S100 calcium binding protein A6 (calcyclin) (S100a6), mRNA [NM_011313]	283	NM_011313	A_51_P281089	30389	-0.808415	0.980649	-0.894532	13.2564	-5.85186	-1.51163	-1.21103	1.61211	-1.41157	13.3887	-8.54999	-1.33483
S100a8	ref|NM_013650|gb|Y09039|gb|M83218|gb|AK157837	Mus musculus S100 calcium binding protein A8 (calgranulin A) (S100a8), mRNA [NM_013650]	271	NM_013650	A_51_P256827	2445	0.913161	-0.8842	0.898681	8.49686	4.43727	-2.64123	3.36194	-3.1903	3.27612	10.8803	27.1132	1.11328
S100a9	ref|NM_009114|gb|CB587684|gb|AK143826|gb|M83219	Mus musculus S100 calcium binding protein A9 (calgranulin B) (S100a9), mRNA [NM_009114]	390	NM_009114	A_51_P402943	2171	1.14519	-0.988592	1.06689	10.9291	5.63888	-1.66561	3.2076	-3.01545	3.11152	12.0483	25.1398	1.01884
S100b	ref|NM_009115|gb|BC061178|gb|AK134625|gb|AK161945	Mus musculus S100 protein, beta polypeptide, neural (S100b), mRNA [NM_009115]	405	NM_009115	A_51_P208083	15278	-1.51634	1.47467	-1.49551	11.2172	-10.12	0.74616	-1.69434	1.4826	-1.58847	11.6908	-12.5262	-0.306906
